# Supplementary material for: Progression and Regression: Distinct Developmental Patterns of Diabetic Retinopathy in Patients With Type 2 Diabetes Treated in the Diabetes Care System West-Friesland, the Netherlands
Source: PubMed Central journal article supplement — Diabetes Care. 2011 Mar 21;34(4):867–72. doi: 10.2337/dc10-1741 (PMC3064043; doi:10.2337/dc10-1741), 2011-03-21

SUPPLEMENTARY DATA

Supplementary Figure 1. Probabilities of EURODIAB retinopathy grades at T0 through T6 per cluster.

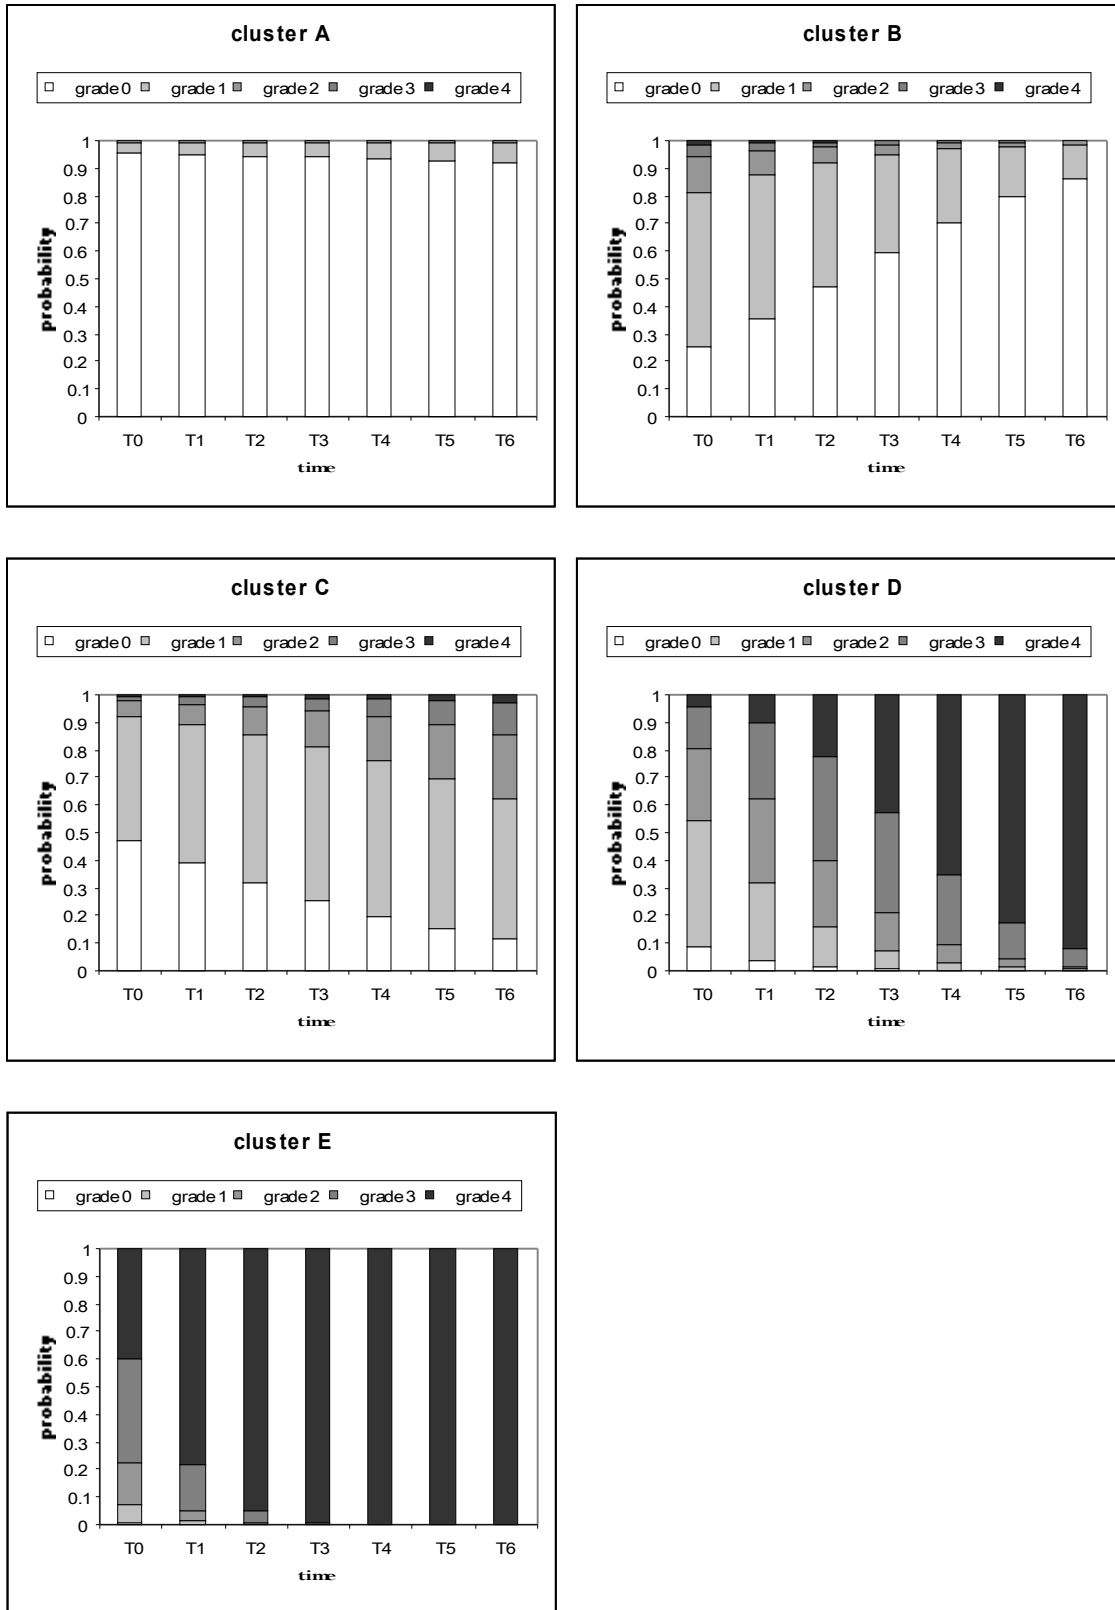

Supplement: supp_34.4.867v101741_DC101741SupplementaryData.pdf [file supp_34.4.867v101741_DC101741SupplementaryData.pdf]
